# Supplementary material for: Differential Gene Expression Associated with BMI, Gender, and IBS-subtype in Human White Blood Cells: Results from a Custom 250-plex Nanostring Probe Panel
Source: Preprints.org preprint supplement (doi:10.20944/preprints201912.0180.v1), 2019-12-13
Supplement: Supplementary file 1 [file SupMaterial_1_ProbeAnnotations.xlsx]

## Sheet: Sheet1
HUGO Name	Gene Class (Nanostring)	Cell Type (Nanostring)	Annotation (Nanostring)	Reference (Non-Nanostring)
A2M	Immune Response		Chemokines and receptors, Innate immune response	Chatham
AASS				Sasse 2015
ABCF1	Housekeeping
ADAM9				Abey et al
AGO2				miRNA pathway
AKT3	Immune Response - Cell Type specific	Tem	Basic cell functions, Cell Type specific
Angptl4				Chinenov 2014
ANP32B	Immune Response - Cell Type specific	T helper cell	Basic cell functions, Cell Type specific
ANXA1	Immune Response		Phagocytosis recognition and engulfment	Xavier 2016, Chatham review
APOE	Immune Response - Cell Type specific	Macrophages	Cell Type specific, Lipid transporter activity
Areg				Chinenov 2014
ARL4D				Chinenov 2014
Atf3				Chinenov 2014
ATM	Immune Response - Cell Type specific	Tcm	Cell Type specific, DNA damage checkpoint, Induction of apoptosis
BATF	Immune Response - Cell Type specific	T helper cell	Basic cell functions, Cell Type specific
BCL2	Immune Response - Cell Type specific	NK cell	Cell Type specific, G1/S transition of mitotic cell cycle
BCL6	Immune Response - Cell Type specific	TFH	Cell Type specific, Regulation of immune response
BHLHE40				Chinenov 2014
BLK	Immune Response - Cell Type specific	B-cell	B-cell receptor signaling pathway, Cell Type specific
BTLA	Immune Response - Checkpoint		Basic cell functions, CD molecules
BTNL3				Abey et al
CCL13	Immune Response - Cell Type specific	DC	Cell Type specific, Chemokines and receptors, Inflammatory response
CCL17	Immune Response - Cell Type specific	DC	Cell Type specific, Chemokines and receptors, Inflammatory response
Ccl2				Chinenov 2014
CCL22	Immune Response - Cell Type specific	DC	Cell Type specific, Chemokines and receptors, Defense response to virus
Ccl3				Chinenov 2014
Ccl4				Chinenov 2014
CCL7	Immune Response - Cell Type specific	Macrophages	Cell Type specific, Chemokines and receptors, Inflammatory response
CCNG2				Abey et al
CCR2	Immune Response - Cell Type specific	Tem	Cell Type specific, CD molecules, Cytokines and receptors, Inflammatory response
CCR3	Immune Response - Cell Type specific	Eosinophils	Cell Type specific, CD molecules, Chemokines and receptors
CCR5	Immune Response		CD molecules, Cytokines and receptors, T-cell polarization
CD14	Immune Response		CD molecules, Innate immune response
CD160	Immune Response - Cell Type specific	Tgd	Cell Type specific, CD molecules, Regulation of immune response
CD163	Immune Response		CD molecules, Phagocytosis
CD19	Immune Response - Cell Type specific	B-cell	B-cell receptor signaling pathway, Cell Type specific, CD molecules, Regulation of immune response
CD1A	Immune Response - Cell Type specific	iDC	Basic cell functions, Cell Type specific, CD molecules
CD1B	Immune Response - Cell Type specific	iDC	Basic cell functions, Cell Type specific, CD molecules
CD1E	Immune Response - Cell Type specific	iDC	Antigen processing and presentation, Cell Type specific, CD molecules
CD2	Immune Response - Cell Type specific	T-cell	Cell Type specific, CD molecules, Leukocyte migration, T-cell activation, T-cell differentiation
CD209	Immune Response - Cell Type specific	DC	Basic cell functions, Cell Type specific, CD molecules
CD27	Immune Response - Checkpoint		B-cell differentiation, CD molecules
CD274	Immune Response		CD molecules, T-cell polarization
CD28	Immune Response - Cell Type specific / Checkpoint	T helper cell	Cell Type specific, CD molecules, Humoral immune response, Inflammatory response to antigenic stimulus, T-cell activation, T-cell proliferation
Cd300lb				Chinenov 2014
CD33	Immune Response		CD molecules
CD38	Immune Response - Cell Type specific	Th1 cell	Adaptive immune response, Cell Type specific, CD molecules, Response to drug, Positive regulation of B-cell proliferation
CD3E	Immune Response - Cell Type specific	T-cell	Adaptive immune response, Cell Type specific, CD molecules, T-cell anergy, T-cell differentiation, T-cell proliferation
CD3G	Immune Response - Cell Type specific	T-cell	Adaptive immune response, Cell Type specific, CD molecules, Regulation of immune response, T-cell activation
CD4	Immune Response		Adaptive immune response, CD molecules, Innate immune response
CD40	Immune Response		Adaptive immune response, CD molecules, Regulation of immune response
CD40LG	Immune Response - Checkpoint		Adaptive immune response, CD molecules, Regulation of immune response
CD6	Immune Response - Cell Type specific	T-cell	Adaptive immune response, Basic cell functions, Cell Type specific, CD molecules
CD62L				Xavier 2016
CD68	Immune Response - Cell Type specific	Macrophages	Basic cell functions, Cell Type specific, CD molecules
CD8A	Immune Response - Cell Type specific	CD8 T-cell	Adaptive immune response, Antigen processing and presentation, Cell Type specific, CD molecules, Defense response to virus, T-cell activation, T-cell differentiation
CD8B	Immune Response - Cell Type specific	CD8 T-cell	Adaptive immune response, Cell Type specific, CD molecules, Regulation of immune response, T-cell activation
CD9	Immune Response		CD molecules
CEBPB
CHIT1	Immune Response - Cell Type specific	Macrophages	Basic cell functions, Cell Type specific
Cited2				Chinenov 2014
CLTC	Housekeeping
CMA1	Immune Response - Cell Type specific	Mast cell	Cell Type specific, Regulation of inflammatory response
CR2	Immune Response - Cell Type specific	B-cell	B-cell activation, Cell Type specific, CD molecules, Innate immune response
CSF2	Immune Response - Cell Type specific	Th1 cell	Cell Type specific, Cytokines and receptors, Positive regulation of macrophages
CSF3R	Immune Response - Cell Type specific	Neutrophils	Cell Type specific, CD molecules, Cytokines and receptors
CTLA4	Immune Response - Cell Type specific / Checkpoint	Th1 cell	Adaptive immune response, B-cell receptor signaling pathway, Cell Type specific, CD molecules, T-cell receptor signaling pathway
CTSG	Immune Response - Cell Type specific	Mast cell	Cell Type specific, Defense response to fungus, Positive regulation of immune response
Cxcl10				Chinenov 2014
CXCL13	Immune Response - Cell Type specific	TFH	Adaptive immune response, Cell Type specific, Chronic inflammatory response, Humoral immune response, Chemokines and receptors
CXCL5	Immune Response - Cell Type specific	Macrophages	Cell Type specific, Chemokines and receptors
CXCL8	Immune Response		Chemokines and receptors, Cytokines and receptors, Defense response to virus, Innate immune response, Interleukins, Regulation of inflammatory response	Chatham review
CXCR4	Immune Response		Adaptive immune response, CD molecules, Chemokines and receptors, Co-Regulators of autophagy and apoptosis/cell cycle, T-cell polarization	Chatham review
CXCR6	Immune Response - Cell Type specific	Th2 cell	Cell Type specific, CD molecules, Chemokines and receptors
Ddit4				Chinenov 2014
DGCR8				miRNA pathway
DICER1				miRNA pathway
DOCK9	Immune Response - Cell Type specific	Tcm	Basic cell functions, Cell Type specific
DROSHA				miRNA pathway
DUSP1				Xavier 2016
Dusp5				Chinenov 2014
Egr2				Chinenov 2014
Egr3				Chinenov 2014
Enc1				Chinenov 2014
Ets1				Chinenov 2014
Etv3				Chinenov 2014
EWSR1	Immune Response - Cell Type specific	Tem	Basic cell functions, Cell Type specific
F13A1	Immune Response - Cell Type specific	iDC	Basic cell functions, Cell Type specific
FEZ1	Immune Response - Cell Type specific	Tgd	Basic cell functions, Cell Type specific
Fkbp5				Chinenov 2014
FLT3LG	Immune Response - Cell Type specific	CD8 T-cell	Cell Type specific, Cytokines and receptors
FOXP3	Immune Response - Cell Type specific	Treg	Cell Type specific, Cytokines and receptors, T-cell mediated immunity, Chronic inflammatory response
FPR2	Immune Response - Cell Type specific	Neutrophils	Cell Type specific, Inflammatory response
FUT5	Immune Response - Cell Type specific	NK cell	Basic cell functions, Cell Type specific
Fzd4				Chinenov 2014
G6PD	Housekeeping
GADD45A				Chinenov 2014
GAPDH	Housekeeping
GATA3	Immune Response - Cell Type specific	Th2 cell	Basic cell functions, Cell Type specific
GLP1R
GNLY	Immune Response - Cell Type specific	Cytotoxic cell	Adaptive immune response, Cell Type specific, Cytotoxicity, Defense response to bacterium, Defense response to fungus
Gpr84				Chinenov 2014
GSTM3				Abey et al
GUSB	Housekeeping
GZMA	Immune Response - Cell Type specific	Cytotoxic cell	Adaptive immune response, Basic cell functions, Cell Type specific, Cytotoxicity
GZMH	Immune Response - Cell Type specific	Cytotoxic cell	Adaptive immune response, Basic cell functions, Cell Type specific, Cytotoxicity
GZMM	Immune Response - Cell Type specific	CD8 T-cell	Adaptive immune response, Basic cell functions, Cell Type specific, Cytotoxicity, Innate immune response
HLA-DOB	Immune Response - Cell Type specific	B-cell	Adaptive immune response, Antigen processing and presentation, Cell Type specific, Cytokines and receptors
HPRT1
HPSE				Abey et al
HSD11B1	Immune Response - Cell Type specific	DC	Basic cell functions, Cell Type specific
Hsp1a				Chinenov 2014
ICOS	Immune Response - Cell Type specific / Checkpoint	T helper cell	Adaptive immune response, Basic cell functions, Cell Type specific, CD molecules
Ier3				Chinenov 2014
Ier5				Chinenov 2014
Ifnb1				Chinenov 2014
IFNG	Immune Response - Cell Type specific	Th1 cell	Adaptive immune response, Cell Type specific, CD8-positive, Cytokines and receptors, Humoral immune response, Interleukins, Th1 orientation, T-cell differentiation
IL10	Immune Response		Immunosuppression, Interleukins	Chatham review
IL12b				Chinenov 2014
IL12RB2	Immune Response - Cell Type specific	Th1 cell	Adaptive immune response, Cell Type specific, Cytokines and receptors, Th1 orientation
IL13	Immune Response		Anti-inflammatory cytokines, Cytokines and receptors, Interleukins, Macrophage activation, Regulators of Th1 and Th2 development, Th2 orientation	Chatham review
Il15ra				Chinenov 2014
IL17A	Immune Response - Cell Type specific	Th17 cell	Cell Type specific, Cytokines and receptors, Inflammatory response, Interleukins
IL17RA	Immune Response - Cell Type specific	Th17 cell	Basic cell functions, Cell Type specific, CD molecules
IL1A	Immune Response		Acute-phase response, Cytokines and receptors, Inflammatory response, Innate immune response, Interleukins	Chinenov 2014, Chatham review
IL1B	Immune Response		Innate immune response, Chemokines and receptors, Cytokines and receptors, Defense response to virus, Interleukins, Regulation of inflammatory response	Xavier 2016, Chinenov 2014, Chatham review
Il1f9				Chinenov 2014
IL1R2	Immune Response		CD molecules, Cytokines and receptors	Chatham review
Il1rn				Chinenov 2014
IL2	Immune Response		Adaptive immune response, Anti-inflammatory cytokines, B-cell activation, Cytokines and receptors, Innate immune response, Interleukins, Th1 & Th2 differentiation, T-cell differentiation, T-cell polarization, T-cell regulators	Chatham review
IL26	Immune Response - Cell Type specific	Th2 cell	Cell Type specific, Cytokines and receptors, Interleukins
IL2RA	Immune Response		Adaptive immune response, CD molecules, Inflammatory response to antigenic stimulus, Negative regulation of immune response
IL3	Immune Response		Interleukins, Regulators of Th1 and Th2 development	Chatham review
IL3RA	Immune Response - Cell Type specific	pDC	Basic cell functions, Cell Type specific, CD molecules
IL4	Immune Response		Interleukins, Regulation of immune response, Th2 orientation	Chatham review
IL4R	Immune Response		CD molecules, Cytokines and receptors, Th1 & Th2 differentiation, Th2 orientation, T-cell polarization
IL5	Immune Response		Cytokines and receptors, Interleukins, Regulators of Th1 and Th2 development, Th2 orientation, T-cell polarization	Chatham review
IL5RA	Immune Response - Cell Type specific	Eosinophils	Cell Type specific, CD molecules, Cytokines and receptors
IL6	Immune Response		Humoral immune response, Interleukins	Chatham review
IL7R	Immune Response		Adaptive immune response, CD molecules, Cytokines and receptors	Lee 2005
Irf1				Chinenov 2014
Jdp2				Chinenov 2014
JUN				Chatham review
Junb				Chinenov 2014
Kcnk6				Chinenov 2014
KIR3DL1	Immune Response - Checkpoint		CD molecules, NK cell functions, Regulation of immune response
KIT	Immune Response - Cell Type specific	Mast cell	Basic cell functions, Cell Type specific, CD molecules
KLF15				Sasse 2015
Klf2				Chinenov 2014
Klf4				Sevilla 2015
Klf7				Chinenov 2014
Klf9				Chinenov 2014
KLRD1	Immune Response - Cell Type specific	Cytotoxic cell	Cell Type specific, NK cell functions, Regulation of immune response
KLRF1	Immune Response - Cell Type specific	Cytotoxic cell	Basic cell functions, Cell Type specific, NK cell functions
LAIR2	Immune Response - Cell Type specific	Th2 cell	Basic cell functions, Cell Type specific, CD molecules
LCN2				Xavier 2016
Lif				Chinenov 2014
LTA	Immune Response - Cell Type specific	Th1 cell	Cell Type specific, Chronic inflammatory response to antigenic stimulus, Cytokines and receptors, Humoral immune response
LTK	Immune Response - Cell Type specific	Tem	Basic cell functions, Cell Type specific
LYZ				Abey et al
MAF	Immune Response - Cell Type specific	TFH	Basic cell functions, Cell Type specific, Th2 orientation
MAP2K1	Immune Response		Innate immune response	Chatham review
MAPK1	Immune Response		Innate immune response	Chatham review
MAPK11	Immune Response		Innate immune response	Chatham review
MAPK12				Chatham review
MAPK13				Chatham review
MAPK14	Immune Response		Innate immune response	Chatham review
MAPK8	Immune Response		Innate immune response	Chatham review
MARCO	Immune Response - Cell Type specific	Macrophages	Cell Type specific, Innate immune response
MME	Immune Response - Cell Type specific	Neutrophils	Basic cell functions, Cell Type specific, CD molecules
MS4A1	Immune Response - Cell Type specific	B-cell	Basic cell functions, Cell Type specific, CD molecules, Humoral immune response
MS4A2	Immune Response - Cell Type specific	Mast cell	Cell Type specific, Humoral immune response, Inflammatory response
MSR1	Immune Response - Cell Type specific	Macrophages	Basic cell functions, Cell Type specific, CD molecules
MT2A				Sasse 2015
MUC1				Abey et al
Mxd1				Chinenov 2014
NCAM1	Immune Response		CD molecules
NCR1	Immune Response - Cell Type specific	NK cell	Basic cell functions, Cell Type specific, CD molecules, NK cell functions
NEFL	Immune Response - Cell Type specific	Tcm	Basic cell functions, Cell Type specific
NFATC4	Immune Response - Cell Type specific	Tem	Cell Type specific, Inflammatory response
Nfil3				Chinenov 2014
NFKB1	Immune Response		Innate immune response	Chatham review
NFKB2	Immune Response		Innate immune response	Chatham review
NFKBIA	Immune Response		Innate immune response	Chatham review, Xavier 2016
NLRP2				Xavier 2016
NMUR1
NR3C1				Chinenov 2014
NT5E	Immune Response		CD molecules, Phagocytosis
NUMA1				Abey et al
NUP107	Immune Response - Cell Type specific	T helper cell	Cell Type specific, M phase of mitotic cell cycle
PDCD1	Immune Response - Cell Type specific / Checkpoint	TFH	Adaptive immune response, Cell Type specific, CD molecules, Humoral immune response, Negative regulation of immune response
PDCD1LG2	Immune Response		Adaptive immune response, CD molecules
Per1				Chinenov 2014
Pfkfb3				Chinenov 2014
PMCH	Immune Response - Cell Type specific	Th2 cell	Basic cell functions, Cell Type specific
POLR2A
Prdm1				Chinenov 2014
PRF1	Immune Response - Cell Type specific	CD8 T-cell	Adaptive immune response, Cell Type specific, Cytotoxicity, Defense response to tumor cell, Defense response to virus
PRG2	Immune Response - Cell Type specific	Mast cell	Cell Type specific, Defense response to bacterium
PRKAA1				Abey et al
PRODH				Sasse 2015
PTGDR2	Immune Response - Cell Type specific	Eosinophils	Basic cell functions, Cell Type specific, CD molecules
Ptgs2				Chinenov 2014
PTX3				Xavier 2016
RAB11A				Abey et al
RAB8B				Abey et al
Rasgef1b				Chinenov 2014
REL	Immune Response		Transcription factors	Chatham review
RELA	Immune Response		Innate immune response	Chatham review
RELB	Immune Response		Transcription factors	Chatham review
REPS1	Immune Response - Cell Type specific	Tcm	Basic cell functions, Cell Type specific
Rit1				Chinenov 2014
RORC	Immune Response - Cell Type specific	Th17 cell	Basic cell functions, Cell Type specific
RPL19				Abey et al
SAAS				Xavier 2016
Sik1				Chinenov 2014
SLPI				Chatham review
SMAD2	Immune Response - Cell Type specific	Th2 cell	Basic cell functions, Cell Type specific
SMPD3	Immune Response - Cell Type specific	Eosinophils	Basic cell functions, Cell Type specific
STAT4	Immune Response - Cell Type specific	Th1 cell	Adaptive immune response, Cytokines and receptors, Cell Type specific, Transcription factors, Transcriptional regulators, Th1 orientation
STAT6	Immune Response - Cell Type specific	Th2 cell	Adaptive immune response, Cytokines and receptors, Cell Type specific, Th2 orientation, Transcription factors, Transcriptional regulators
SYT17	Immune Response - Cell Type specific	iDC	Basic cell functions, Cell Type specific
TARBP2				miRNA pathway
TARP	Immune Response - Cell Type specific	Tgd	Basic cell functions, Cell Type specific
TAS1R3	Taste Receptor
TAS2R38	Taste Receptor
TBP	Housekeeping
TBX21	Immune Response - Cell Type specific	Th1 cell	Adaptive immune response, Cell Type specific, Regulation of immune response, Th1 orientation
TGFB1	Immune Response		Immunosuppression, Interleukins, Negative regulation of immune response
TGFB2	Immune Response		Immunosuppression, Interleukins
THBS1	Immune Response - Cell Type specific	Eosinophils	Cell cycle arrest, Cell Type specific, Chronic inflammatory response, Negative regulation of antigen processing
TLR2	Toll-Like Receptors
TLR4	Toll-Like Receptors
TNF	Immune Response	Chatham review	Humoral immune response, Interleukins, TNF superfamily members and their receptors	Chinenov 2014
Tnfaip2				Chinenov 2014
TNFRSF17	Immune Response - Cell Type specific	B-cell	Basic cell functions, Cell Type specific, CD molecules, TNF superfamily members and their receptors
TNFRSF18	Immune Response		TNF superfamily members and their receptors
TNFRSF4	Immune Response - Checkpoint		CD molecules, TNF superfamily members and their receptors
TNFRSF9	Immune Response - Checkpoint		CD molecules, TNF superfamily members and their receptors
Tnfsf4				Chinenov 2014
TOLLIP				Xavier 2016
TPSAB1	Immune Response - Cell Type specific	Mast cell	Basic cell functions, Cell Type specific
TRIO				Abey et al
Tsc22d3				Sevilla 2015
TUBB	Housekeeping
USP9Y	Immune Response - Cell Type specific	Tcm	Basic cell functions, Cell Type specific
VEGFA	Immune Response		Leukocyte migration, Cytokines and receptors
XPO5				miRNA pathway
ZFP36				Xavier 2016, Sevilla 2015
ZNF205	Immune Response - Cell Type specific	NK cell	Basic cell functions, Cell Type specific
